# Supplementary material
Source: publisher figshare collection journal article supplement (https://sage.figshare.com/ndownloader/files/20098442)
Supplement: Supplementary file 1 [file 20098442]

Table S2. Path model coefficients and indirect effects of attachment anxiety on the holistic impressions of manifest anxiety and social disengagement via different communication channels ( $N = 85$ ).

Most of the results reported in this table are either reported in Table 1 (indirect effects) or Figures 1 and 2 (path coefficients). In addition to the findings reported in the main paper, this table shows the associations between the covariates and the different channels and holistic impressions. For ease of reference, the effects of the covariates, which are only presented here, are in bold.

| Parameters                            | Path coefficients |                   |                              |                   | Indirect Effects |       |       |
|---------------------------------------|-------------------|-------------------|------------------------------|-------------------|------------------|-------|-------|
|                                       | To<br>content     | To<br>sound       | To<br>visual                 | To<br>outcome     | 95% CI           |       |       |
|                                       |                   |                   |                              |                   | Estimate<br>(SE) | Lower | Upper |
| Outcome : Manifest Anxiety (MANx)     |                   |                   |                              |                   |                  |       |       |
| <i>Predictors</i>                     |                   |                   |                              |                   |                  |       |       |
| Attachment Anxiety                    | .23 (.11)*        | .15 (.06)*        | .24 (.09)**                  | .10 (.06)         |                  |       |       |
| <b>Attachment Avoidance</b>           | <b>.08 (.11)</b>  | <b>.01 (.06)</b>  | <b>.14 (.08)</b>             | <b>-.00 (.06)</b> |                  |       |       |
| <b>Gender</b>                         | <b>.12 (.22)</b>  | <b>-.02 (.13)</b> | <b>-.23 (.18)</b>            | <b>.14 (.12)</b>  |                  |       |       |
| <i>Mediators (channels)</i>           |                   |                   |                              |                   |                  |       |       |
| Content                               |                   |                   |                              | .40 (.07)***      |                  |       |       |
| Sound                                 |                   |                   |                              | .28 (.12)*        |                  |       |       |
| Visual                                |                   |                   |                              | .42 (.09)***      |                  |       |       |
| <i>Mediation (through channels)</i>   |                   |                   |                              |                   |                  |       |       |
| Anx → Content → MANx                  |                   |                   |                              |                   | .09 (.04)        | .02   | .19   |
| Anx → Sound → MANx                    |                   |                   |                              |                   | .04 (.02)        | .01   | .09   |
| Anx → Visual → MANx                   |                   |                   |                              |                   | .10 (.04)        | .03   | .17   |
| Total effect                          |                   |                   |                              |                   | .24 (.07)        | .10   | .36   |
| Outcome : Social Disengagement (SDis) |                   |                   |                              |                   |                  |       |       |
| <i>Predictors</i>                     |                   |                   |                              |                   |                  |       |       |
| Attachment Anxiety                    | .15 (.10)         | .21 (.06)**       | .18 (.10) <sup>t</sup>       | .05 (.05)         |                  |       |       |
| <b>Attachment Avoidance</b>           | <b>.07 (.09)</b>  | <b>.03 (.06)</b>  | <b>.17 (.09)<sup>t</sup></b> | <b>.01 (.05)</b>  |                  |       |       |
| <b>Gender</b>                         | <b>-.13 (.20)</b> | <b>.27 (.13)*</b> | <b>.50 (.19)*</b>            | <b>.21 (.10)*</b> |                  |       |       |
| <i>Mediators (channels)</i>           |                   |                   |                              |                   |                  |       |       |
| Content                               |                   |                   |                              | .32 (.06)***      |                  |       |       |
| Sound                                 |                   |                   |                              | .62 (.10)***      |                  |       |       |
| Visual                                |                   |                   |                              | .37 (.07)***      |                  |       |       |
| <i>Mediation (through channels)</i>   |                   |                   |                              |                   |                  |       |       |
| Anx → Content → SDis                  |                   |                   |                              |                   | .05 (.03)        | -.008 | .11   |
| Anx → Sound → SDis                    |                   |                   |                              |                   | .13 (.04)        | .05   | .21   |
| Anx → Visual → SDis                   |                   |                   |                              |                   | .07 (.04)        | .002  | .14   |
| Total effect                          |                   |                   |                              |                   | .24 (.07)        | .10   | .38   |

Note. Anx = Attachment anxiety. Gender (0 = female, 1 = male). All predictors were mean centered.

Confidence intervals that do not include zero indicate mediation.

\*\*\*  $p < .001$ , \*\*  $p < .01$ , \*  $p < .05$ , <sup>t</sup>  $p < .10$ .
